# Supplementary material for: Biotransformation of chromium by root nodule bacteria Sinorhizobium sp. SAR1
Source: PubMed Central journal article supplement (PMC6667149; doi:10.1371/journal.pone.0219387), 2019-07-30
Supplement: pone.0219387.s001.pdf [file pone.0219387.s001.pdf]

**S1 Table. Plate MIC values for 22 isolates**

| <b>Isolates</b> | <b>Cr concentration<br/>mM</b> |
|-----------------|--------------------------------|
| <b>KHA1</b>     | 0.5                            |
| <b>KHA2</b>     | 0.5                            |
| <b>KAL1</b>     | 0.5                            |
| <b>TUR1</b>     | 0.5                            |
| <b>TUR2</b>     | 0.5                            |
| <b>CRO1</b>     | 0.5                            |
| <b>CRO2</b>     | 0.5                            |
| <b>UNQ3</b>     | 0.5                            |
| <b>SHE2</b>     | 0.5                            |
| <b>MUM1</b>     | 0.5                            |
| <b>SON2</b>     | 0.5                            |
| <b>BEL4</b>     | 1(+)                           |
| <b>BEL5B</b>    | 0.5                            |
| <b>LIN1</b>     | 0.5 (+)                        |
| <b>KAL2</b>     | 0.5                            |
| <b>KAL3</b>     | 1                              |
| <b>KAL5</b>     | 0.5                            |
| <b>MUM3</b>     | 1                              |
| <b>TAL1</b>     | 0.5                            |
| <b>SAR1</b>     | 1                              |
| <b>HIN2</b>     | 0.5                            |
| <b>KAL4</b>     | 0.5                            |
