# Supplementary material for: Biotransformation of chromium by root nodule bacteria Sinorhizobium sp. SAR1
Source: PubMed Central journal article supplement (PMC6667149; doi:10.1371/journal.pone.0219387), 2019-07-30
Supplement: pone.0219387.s002.pdf [file pone.0219387.s002.pdf]

**S2 Table. Effect of Cr concentration on bioreduction and uptake by SAR1**

| <b>Cr (VI)</b> | <b>% Cr (VI) Removal</b> | <b>SD</b> | <b>Uptake(mg/g)</b> | <b>SD</b> |
|----------------|--------------------------|-----------|---------------------|-----------|
| <b>100</b>     | 99.87786                 | 0.480833  | 6.273333            | 0.480833  |
| <b>200</b>     | 96.45694                 | 0.895669  | 10.86               | 0.895669  |
| <b>300</b>     | 89.78514                 | 1.439669  | 15.522              | 1.439669  |
| <b>400</b>     | 86.88574                 | 0.303585  | 22.57467            | 0.303585  |
| <b>500</b>     | 83.68899                 | 2.234457  | 28.94667            | 2.234457  |
