# Supplementary material for: Biotransformation of chromium by root nodule bacteria Sinorhizobium sp. SAR1
Source: PubMed Central journal article supplement (PMC6667149; doi:10.1371/journal.pone.0219387), 2019-07-30
Supplement: pone.0219387.s003.pdf [file pone.0219387.s003.pdf]

**S3 Table. Adsorption isotherm for isolate SAR1 after Cr biosorption A: Langmuir isotherm; B: Freundlich isotherm**

| <b>Cr (VI)</b> | <b>1/ceq</b> | <b>1/q</b> | <b>logCeq</b> | <b>logq</b> |
|----------------|--------------|------------|---------------|-------------|
| <b>100</b>     | 0.016028     | 0.140951   | 1.795115      | 0.850932    |
| <b>200</b>     | 0.007457     | 0.07515    | 2.127429      | 1.124069    |
| <b>300</b>     | 0.005003     | 0.047655   | 2.300791      | 1.321888    |
| <b>400</b>     | 0.003653     | 0.032808   | 2.437307      | 1.484015    |
| <b>500</b>     | 0.002928     | 0.026582   | 2.533454      | 1.575419    |
