# Supplementary material for: Biotransformation of chromium by root nodule bacteria Sinorhizobium sp. SAR1
Source: PubMed Central journal article supplement (PMC6667149; doi:10.1371/journal.pone.0219387), 2019-07-30
Supplement: pone.0219387.s004.pdf [file pone.0219387.s004.pdf]

**S4 Table. Adsorption constants estimated from the Langmuir and Freundlich equation for Biosorption of Cr by SAR1**

| Langmuir          |          |        | Freundlich |            |        |
|-------------------|----------|--------|------------|------------|--------|
| $q_{\max}$ (mg/g) | <b>b</b> | $R^2$  | <b>K</b>   | <b>1/n</b> | $R^2$  |
| 285.71            | 0.000402 | 0.9929 | 0.11       | 0.9957     | 0.9934 |
